# Supplementary material for: Independent Association of Physical Activity with Nonalcoholic Fatty Liver Disease and Alanine Aminotransferase Levels
Source: PubMed Central journal article supplement (PMC6678247; doi:10.3390/jcm8071013), 2019-07-10
Supplement: jcm-08-01013-s001.pdf [file jcm-08-01013-s001.pdf]

**Supplementary Table 1.** Sociodemographic, lifestyle, and clinical correlates for NAFLD ( $n = 32,391$ ).

|                                         | <b>Model 1</b>   | <b>Model 2</b> | <b>Model 3</b>   | <b>Model 4</b>  | <b>Model 5</b>  |
|-----------------------------------------|------------------|----------------|------------------|-----------------|-----------------|
| Age (per 10 years)                      | 1.03 (1.01–1.05) | 0.9 (0.8–0.9)  | 0.8 (0.8–0.9)    | 0.7 (0.7–0.8)   | 0.7 (0.7–0.7)   |
| Male sex                                | 1.4 (1.3–1.5)    | 1.1 (1.01–1.2) | 1.2 (0.99–1.4)   | 1.1 (0.9–1.3)   | 1.1 (0.9–1.3)   |
| BMI (per 1 kg/m <sup>2</sup> )          |                  | 2.4 (2.3–2.4)  | 2.4 (2.3–2.5)    | 2.5 (2.4–2.5)   | 2.4 (2.3–2.5)   |
| Central obesity                         |                  |                |                  |                 | 1.4 (1.2–1.6)   |
| Total calorie intake (per 100 kcal/day) |                  |                | 1.0 (0.99–1.003) | 1.0 (0.99–1.01) | 1.0 (0.99–1.01) |
| Sleep duration (per 1 h/day)            |                  |                | 1.0 (0.99–1.1)   | 1.0 (0.97–1.1)  | 1.0 (0.97–1.1)  |
| Smoking                                 |                  |                |                  |                 |                 |
| Never                                   |                  |                | 1.0              | 1.0             | 1.0             |
| Past                                    |                  |                | 1.1 (0.9–1.3)    | 1.1 (0.9–1.3)   | 1.0 (0.9–1.2)   |
| Current                                 |                  |                | 1.5 (1.3–1.8)    | 1.5 (1.2–1.8)   | 1.5 (1.2–1.8)   |
| Alcohol (per 1 AUDIT score)             |                  |                | 1.0 (0.96–0.98)  | 1.0 (0.96–0.98) | 1.0 (0.95–0.98) |
| Education                               |                  |                |                  |                 |                 |
| ≤6                                      |                  |                | 1.0              | 1.0             | 1.0             |
| 7–9                                     |                  |                | 1.0 (0.8–1.2)    | 1.0 (0.8–1.2)   | 1.0 (0.8–1.2)   |
| 10–12                                   |                  |                | 0.9 (0.8–1.1)    | 1.0 (0.8–1.2)   | 1.0 (0.8–1.2)   |
| >12                                     |                  |                | 1.0 (0.8–1.2)    | 1.1 (0.9–1.3)   | 1.1 (0.9–1.3)   |
| Diabetes mellitus                       |                  |                |                  | 8.2 (6.9–9.8)   | 8.2 (6.9–9.8)   |
| Cardiovascular disease                  |                  |                |                  | 0.9 (0.7–1.1)   | 0.9 (0.7–1.1)   |
| Hypertension                            |                  |                |                  | 1.1 (0.9–1.2)   | 1.1 (0.9–1.2)   |
| Arthritis                               |                  |                |                  | 1.0 (0.9–1.2)   | 1.0 (0.9–1.2)   |

Values are the OR (95% CI). Model 1, adjusted for physical activity, age and sex. Model 2, adjusted for model 1 plus BMI. Model 3, adjusted for model 2 plus total calorie intake, sleep duration, smoking, alcohol, education level. Model 4, adjusted for model 3 plus diabetes mellitus, cardiovascular disease, hypertension, arthritis. Model 5, adjusted for model 4 plus central obesity. NAFLD, non-alcoholic fatty liver disease; OR, odds ratio; BMI, body mass index; AUDIT, Alcohol Use Disorders Identification Test.

**Supplementary Table 2.** Sociodemographic, lifestyle, and clinical correlates for lean NAFLD ( $n = 22,312$ ).

|                                         | <b>Model 1</b> | <b>Model 2</b> | <b>Model 3</b>   | <b>Model 4</b>  | <b>Model 5</b>  |
|-----------------------------------------|----------------|----------------|------------------|-----------------|-----------------|
| Age (per 10 years)                      | 1.0 (0.98–1.1) | 0.9 (0.9–0.9)  | 0.8 (0.8–0.9)    | 0.8 (0.7–0.8)   | 0.8 (0.7–0.8)   |
| Male sex                                | 2.0 (1.7–2.4)  | 1.5 (1.3–1.8)  | 1.8 (1.4–2.3)    | 1.6 (1.2–2.0)   | 1.6 (1.2–2.0)   |
| BMI (per 1 kg/m <sup>2</sup> )          |                | 2.2 (2.0–2.4)  | 2.2 (2.0–2.3)    | 2.2 (2.0–2.4)   | 2.2 (2.0–2.4)   |
| Central obesity                         |                |                |                  |                 | 1.3 (0.97–1.7)  |
| Total calorie intake (per 100 kcal/day) |                |                | 1.0 (0.98–1.003) | 1.0 (0.99–1.01) | 1.0 (0.98–1.01) |
| Sleep duration (per 1 h/day)            |                |                | 1.0 (0.98–1.1)   | 1.0 (0.97–1.1)  | 1.0 (0.97–1.1)  |
| Smoking                                 |                |                |                  |                 |                 |
| Never                                   |                |                | 1.0              | 1.0             | 1.0             |
| Past                                    |                |                | 1.2 (0.9–1.6)    | 1.2 (0.9–1.6)   | 1.2 (0.9–1.6)   |
| Current                                 |                |                | 1.3 (0.97–1.7)   | 1.3 (0.96–1.7)  | 1.3 (0.96–1.7)  |
| Alcohol (per 1 AUDIT score)             |                |                | 1.0 (0.9–0.98)   | 1.0 (0.9–0.98)  | 1.0 (0.9–0.98)  |
| Education                               |                |                |                  |                 |                 |
| ≤6                                      |                |                | 1.0              | 1.0             | 1.0             |
| 7–9                                     |                |                | 0.9 (0.7–1.3)    | 0.9 (0.6–1.3)   | 0.9 (0.6–1.3)   |
| 10–12                                   |                |                | 1.1 (0.8–1.5)    | 1.1 (0.8–1.5)   | 1.1 (0.8–1.5)   |
| >12                                     |                |                | 1.1 (0.8–1.5)    | 1.2 (0.8–1.6)   | 1.2 (0.9–1.7)   |
| Diabetes mellitus                       |                |                |                  | 7.2 (5.6–9.2)   | 7.2 (5.6–9.2)   |
| Cardiovascular disease                  |                |                |                  | 0.8 (0.5–1.2)   | 0.8 (0.5–1.2)   |
| Hypertension                            |                |                |                  | 1.2 (0.9–1.5)   | 1.2 (0.9–1.5)   |
| Arthritis                               |                |                |                  | 0.8 (0.6–1.1)   | 0.8 (0.6–1.1)   |

Values are the OR (95% CI). Model 1, adjusted for physical activity, age and sex. Model 2, adjusted for model 1 plus BMI. Model 3, adjusted for model 2 plus total calorie intake, sleep duration, smoking, alcohol, education level. Model 4, adjusted for model 3 plus diabetes mellitus, cardiovascular disease, hypertension, arthritis. Model 5, adjusted for model 4 plus central obesity. NAFLD, non-alcoholic fatty liver disease; OR, odds ratio; BMI, body mass index; AUDIT, Alcohol Use Disorders Identification Test.

**Supplementary Table 3.** Sociodemographic, lifestyle, and clinical correlates for abnormal levels of ALT\* among participants with NAFLD (*n* = 6968).

|                                         | <b>Model 1</b> | <b>Model 2</b>   | <b>Model 3</b>   | <b>Model 4</b>   | <b>Model 5</b>   |
|-----------------------------------------|----------------|------------------|------------------|------------------|------------------|
| Age (per 10 years)                      | 1.0 (0.9–1.01) | 1.0 (0.9–0.9996) | 0.9 (0.9–1.01)   | 0.9 (0.8–0.98)   | 0.9 (0.8–0.98)   |
| Male sex                                | 1.4 (1.3–1.6)  | 1.4 (1.2–1.6)    | 1.5 (1.2–1.8)    | 1.4 (1.1–1.7)    | 1.4 (1.2–1.8)    |
| BMI (per 1 kg/m <sup>2</sup> )          |                | 0.9 (0.9–0.97)   | 0.9 (0.9–0.97)   | 0.9 (0.9–0.97)   | 0.9 (0.9–0.97)   |
| Central obesity                         |                |                  |                  |                  | 1.1 (0.9–1.3)    |
| Total calorie intake (per 100 kcal/day) |                |                  | 1.0 (0.99–1.004) | 1.0 (0.99–1.004) | 1.0 (0.99–1.004) |
| Sleep duration (per 1 h/day)            |                |                  | 1.0 (0.96–1.1)   | 1.0 (0.95–1.1)   | 1.0 (0.95–1.1)   |
| Smoking                                 |                |                  |                  |                  |                  |
| Never                                   |                |                  | 1.0              | 1.0              | 1.0              |
| Past                                    |                |                  | 0.9 (0.7–1.1)    | 0.9 (0.7–1.2)    | 0.9 (0.7–1.2)    |
| Current                                 |                |                  | 1.0 (0.8–1.2)    | 1.0 (0.8–1.2)    | 1.0 (0.8–1.2)    |
| Alcohol (per 1 AUDIT score)             |                |                  | 1.0 (0.99–1.02)  | 1.0 (0.99–1.02)  | 1.0 (0.99–1.02)  |
| Education                               |                |                  |                  |                  |                  |
| ≤6                                      |                |                  | 1.0              | 1.0              | 1.0              |
| 7–9                                     |                |                  | 0.9 (0.7–1.2)    | 0.9 (0.7–1.2)    | 0.9 (0.7–1.2)    |
| 10–12                                   |                |                  | 1.0 (0.7–1.2)    | 1.0 (0.8–1.2)    | 1.0 (0.8–1.2)    |
| >12                                     |                |                  | 1.0 (0.8–1.3)    | 1.0 (0.8–1.3)    | 1.0 (0.8–1.3)    |
| Diabetes mellitus                       |                |                  |                  | 1.1 (0.9–1.4)    | 1.1 (0.9–1.4)    |
| Cardiovascular disease                  |                |                  |                  | 0.8 (0.6–1.1)    | 0.8 (0.6–1.1)    |
| Hypertension                            |                |                  |                  | 1.2 (1.1–1.5)    | 1.2 (1.1–1.5)    |
| Arthritis                               |                |                  |                  | 1.0 (0.8–1.2)    | 1.0 (0.8–1.2)    |

Values are the OR (95% CI). \*Defined as >34 IU/L in men or >24 IU/L in women. Model 1, adjusted for physical activity, age and sex. Model 2, adjusted for model 1 plus BMI. Model 3, adjusted for model 2 plus total calorie intake, sleep duration, smoking, alcohol, education level. Model 4, adjusted for model 3 plus diabetes mellitus, cardiovascular disease, hypertension, arthritis. Model 5, adjusted for model 4 plus central obesity. ALT, alanine aminotransferase; NAFLD, non-alcoholic fatty liver disease; OR, odds ratio; BMI, body mass index; AUDIT, Alcohol Use Disorders Identification Test.

**Supplementary Table 4.** Sociodemographic, lifestyle, and clinical correlates for abnormal levels of AST\* among participants with NAFLD (*n* = 6968).

|                                         | <b>Model 1</b> | <b>Model 2</b> | <b>Model 3</b>   | <b>Model 4</b>   | <b>Model 5</b>   |
|-----------------------------------------|----------------|----------------|------------------|------------------|------------------|
| Age (per 10 years)                      | 1.1 (1.01–1.1) | 1.1 (1.03–1.1) | 1.1 (0.99–1.2)   | 1.0 (0.9–1.1)    | 1.0 (0.9–1.1)    |
| Male sex                                | 0.9 (0.8–1.04) | 0.9 (0.8–1.1)  | 1.0 (0.8–1.3)    | 0.9 (0.7–1.2)    | 0.9 (0.7–1.2)    |
| BMI (per 1 kg/m <sup>2</sup> )          |                | 1.1 (1.03–1.1) | 1.1 (1.03–1.1)   | 1.1 (1.02–1.1)   | 1.1 (1.02–1.1)   |
| Central obesity                         |                |                |                  |                  | 1.0 (0.8–1.2)    |
| Total calorie intake (per 100 kcal/day) |                |                | 1.0 (0.99–1.01)  | 1.0 (0.99–1.01)  | 1.0 (0.99–1.01)  |
| Sleep duration (per 1 h/day)            |                |                | 1.0 (0.9–1.1)    | 1.0 (0.9–1.1)    | 1.0 (0.9–1.1)    |
| Smoking                                 |                |                |                  |                  |                  |
| Never                                   |                |                | 1.0              | 1.0              | 1.0              |
| Past                                    |                |                | 1.0 (0.7–1.2)    | 1.0 (0.7–1.2)    | 1.0 (0.7–1.2)    |
| Current                                 |                |                | 0.9 (0.7–1.1)    | 0.9 (0.7–1.1)    | 0.9 (0.7–1.1)    |
| Alcohol (per 1 AUDIT score)             |                |                | 1.0 (0.997–1.03) | 1.0 (0.996–1.03) | 1.0 (0.996–1.03) |
| Education                               |                |                |                  |                  |                  |
| ≤6                                      |                |                | 1.0              | 1.0              | 1.0              |
| 7–9                                     |                |                | 1.0 (0.8–1.4)    | 1.0 (0.8–1.4)    | 1.0 (0.8–1.4)    |
| 10–12                                   |                |                | 1.0 (0.7–1.3)    | 1.0 (0.8–1.3)    | 1.0 (0.8–1.3)    |
| >12                                     |                |                | 0.9 (0.7–1.2)    | 1.0 (0.7–1.3)    | 1.0 (0.7–1.3)    |
| Diabetes mellitus                       |                |                |                  | 1.5 (1.2–1.8)    | 1.5 (1.2–1.8)    |
| Cardiovascular disease                  |                |                |                  | 1.2 (0.8–1.7)    | 1.2 (0.8–1.7)    |
| Hypertension                            |                |                |                  | 1.1 (0.9–1.4)    | 1.1 (0.9–1.4)    |
| Arthritis                               |                |                |                  | 1.0 (0.8–1.2)    | 1.0 (0.8–1.2)    |

Values are the OR (95% CI). \*Defined as >32 IU/L in men or >26 IU/L in women. Model 1, adjusted for physical activity, age and sex. Model 2, adjusted for model 1 plus BMI. Model 3, adjusted for model 2 plus total calorie intake, sleep duration, smoking, alcohol, education level. Model 4, adjusted for model 3 plus diabetes mellitus, cardiovascular disease, hypertension, arthritis. Model 5, adjusted for model 4 plus central obesity. ALT, alanine aminotransferase; NAFLD, non-alcoholic fatty liver disease; OR, odds ratio; BMI, body mass index; AUDIT, Alcohol Use Disorders Identification Test.
